# Supplementary material
Source: PubMed Central journal article supplement (PMC6156110)
Supplement: sc7b03619_si_001.pdf [file sc7b03619_si_001.pdf]

Supporting Information for

## Selective cleavage of lignin $\beta$ -O-4 aryl ether bond by $\beta$ -etherase of the white-rot fungus

### *Dichomitus squalens*

Mila Marinović<sup>a</sup>, Paula Nousiainen<sup>b</sup>, Adiphol Dilokpimol<sup>c</sup>, Jussi Kontro<sup>b</sup>, Robin Moore<sup>b</sup>, Jussi Sipilä<sup>b</sup>,  
Ronald P. de Vries<sup>a,c</sup>, Miia R. Mäkelä<sup>a</sup>, Kristiina Hildén<sup>a\*</sup>

<sup>a</sup>Division of Microbiology and Biotechnology, Department of Food and Environmental Sciences,  
University of Helsinki, Viikinkaari 9, Helsinki, Finland

<sup>b</sup>Department of Chemistry, Laboratory of Organic Chemistry, University of Helsinki, Finland

<sup>c</sup>Fungal Physiology, Westerdijk Fungal Biodiversity Institute & Fungal Molecular Physiology, Utrecht  
University, Uppsalalaan 8, 3584 CT Utrecht, The Netherlands

\*Corresponding author: email: [kristiina.s.hilden@helsinki.fi](mailto:kristiina.s.hilden@helsinki.fi)

Contents:

**File S1.** Materials and methods for cloning, heterologous expression and purification of Ds-GSTs.

**File S2.** Materials and methods for the synthesis of lignin model compounds.

**File S3.** Materials and methods for chiral chromatography.

**Figure S1.** Alignment of Ds-GST1, Ds-GST2, Ds-GST3 and Ds-GST4 from *D. squalens* with homologs from *Sphingobium* sp. SYK-6 (LigE and LigF), and *P. chrysosporium* (Pc-FuA1).

**Figure S2.** SDS-PAGE analysis of chromatographically purified recombinant Ds-GSTs.

**Figure S3.** Chiral chromatography of racemic lignin model (**1**) at 0 h with LigF and Ds-GST1 catalyzed enzymatic reactions.

**Table S1.** Putative GST encoding sequences of *D. squalens* with corresponding JGI protein IDs (<http://genome.jgi-psf.org/Dicsq1/Dicsq1.home.html>) identified in this study.

## **References**

**File S1.** Materials and methods for cloning, heterologous expression and purification of Ds-GSTs.

### *Cloning of Ds-GSTs*

The genes encoding *D. squalens* Ds-GST1 and Ds-GST2, and *Sphingobium* sp. SYK-6 LigF, used as a positive control, were codon-optimized for *E. coli*, synthesized and cloned into a pET-24a(+) vector (GenScript, USA). Ds-GST3 and Ds-GST4 were amplified from the *D. squalens* cDNA library with primer pairs designed according to the *D. squalens* LYAD-421 SS1 v1.0 genome sequence (Ds-GST3 forward: 5'-CGGAATTCCCATATGCCGGAGCCGATCATATTCTACGAC-3', *Nde*I restriction site underlined; Ds-GST3 reverse: 5'-CGGAATTCGATCCTCAGAGCTCGACGACCGACCCTTC-3', *Bam*HI restriction site underlined; Ds-GST4 forward: 5'-CGGAATTCCCATATGTCAGACCCCATCGTTCTATACGACATACC, *Nde*I restriction site underlined, Ds-GST4 reverse: 5'-CGGAATTCGATCCTTAGACCTTCACCTCGGCGTACACCTCC-3', *Bam*HI restriction site underlined). A 25 µL PCR reaction mixture contained 0.5 µL *D. squalens* cDNA template, 5 µL HF buffer, 0.4 µM dNTP-mix (Thermo Fischer Scientific), 2 µM primers, 0.75 µL DMSO, and 0.5 U Phusion High-Fidelity polymerase (Thermo Fischer Scientific). PCR was performed with initial denaturation at 98°C for 30 s; followed by 45 cycles of (1) denaturation at 98°C for 10 s, (2) annealing at 70°C for 30 s, (3) elongation at 68°C for 1:45 min; and final extension at 68°C for 8 min. Amplification products were ran on 1% agarose gel, the correct size fragments were cut off and purified by using Wizard® SV Gel and PCR Clean-Up System (Promega). The fragments were digested with *Nde*I and *Bam*HI (Promega), ligated into pET28a (T4 DNA ligase, Thermo Scientific) and transformed into *E. coli* DH5α. Selected transformants were sequenced (Macrogen, The Netherlands) and sub-cloned into *E. coli* Rosetta™(DE3)pLysS.

### *Heterologous expression and enzyme purification*

For protein expression, *E. coli* cultures with optical density of 0.6 at 600 nm were induced with 0.1 mM isopropyl  $\beta$ -D-1-thiogalactopyranoside (IPTG, Sigma-Aldrich) and incubated for 24 h (250 rpm, 12°C). The cells were harvested by centrifugation (15 min, 7,000  $\times$  g, 4°C) and incubated overnight at -20°C. The cells were resuspended in 30 mL Bugbuster<sup>TM</sup> protein extraction reagent (Novagen) and centrifuged (30 min, 16,000  $\times$  g, 4°C) to separate soluble protein fraction (supernatant) from insoluble fraction (cells).

Filtered culture supernatants (0.22  $\mu$ m, Sterile Syringe Filter, VWR International) were purified chromatographically with ÄKTA explorer apparatus (GE Healthcare) with Q Sepharose FF and Mono Q 5/50 GL columns (GE Healthcare), respectively. A linear gradient of 0 – 1 M NaCl in 10 mM sodium-acetate buffer, pH 8.5, was used for protein elution. Protein containing fractions were pooled, concentrated and dialyzed into 20 mM HEPES-buffer, pH 7.0, and analyzed by SDS-PAGE (Mini-PROTEAN<sup>®</sup> TGX<sup>TM</sup> Precast Protein Gels, Bio-Rad) and stained with PageBlue Protein Staining Solution (Thermo Scientific). Protein concentration was determined by Pierce<sup>TM</sup> BCA protein assay kit according to manufacturer's instructions (Thermo Fischer Scientific).

**File S2.** Materials and methods for the synthesis of lignin model compounds.

2-(2-methoxyphenoxy)-3-oxo-3-(4-hydroxy-3-methoxyphenyl)propan-1-ol (**1**) and 2-(2-methoxyphenoxy)-3-(4-hydroxy-3-methoxyphenyl)propan-1,3-diol (**2**)<sup>1,2</sup> were used as lignin model compounds. The products were purified with silica flash chromatography (Biotage SP4, Biotage AB, Sweden) and characterized by NMR and ESI-TOF (Bruker MicroTOF). The purity of the products was determined by Agilent 1260 Infinity HPLC. NMR-spectra were recorded using a Varian Inova 500

spectrometer in  $\text{CDCl}_3$ . The purified products were dissolved in freshly distilled 1,4-dioxane (Fischer Scientific) before use in enzyme assays.

Guaiacyl dehydrogenation polymer (G-DHP), was prepared from coniferyl alcohol<sup>3</sup>, which was synthesized from methyl ferulate by reduction with DIBAL-H<sup>4</sup>. The G-DHP was oxidized in the presence of *Trametes villosa* NS-51002 laccase (Novozymes A/S) with methyl syringate (MeS, synthesized from syringic acid (Sigma-Aldrich) and methanol) as a mediator to provide  $\alpha$ -carbonyl functional groups in G-DHP<sup>5</sup>. G-DHP in cellulose (0.5 g) was mixed with 2.5 mL of dioxane (20% (v/v)) in 50 mM succinic acid buffer, pH 5.5, supplied with 0.9 U/ml NS-51002 laccase and 0.38 mM MeS. The mixture was stirred for 24 h, after which the enzymatic reaction was stopped by adding 1mg/mL (2.5 mL) sodium azide solution<sup>6</sup>. After concentrating on rotary evaporator under reduced pressure, the laccase-treated G-DHP was washed with water and ethyl acetate (Fischer Scientific) to remove salts, laccase and mediator together with oligomeric lignin fragments, and finally extracted with 1,4-dioxane and dried under reduced pressure.

### **File S3.** Materials and methods for chiral chromatography

Enzymatic reaction mixtures were evaporated using 35°C vacuum oven (Thermo Scientific) until dry, and subsequently dissolved in 0.1% TFA in 65:35 (v/v) hexane/isopropanol (Fischer Scientific).

Analysis of compound (**1**) and  $\beta$ -etherases-derived residual substrates were conducted *via* chiral chromatographic separation using Agilent 1200 HPLC (Santa Clara, CA, USA) equipped with Chiracel OD-H column (4.6 mm  $\times$  250 mm, 5  $\mu\text{m}$ ; Diacel Corporation) at 20°C and detection wavelength 280 nm. A mobile phase consisting of 0.1% TFA in 65:35 (v/v) hexane/isopropanol was used at the flow rate of 0.6 mL/min. Sample injection volume was 5  $\mu\text{L}$ .

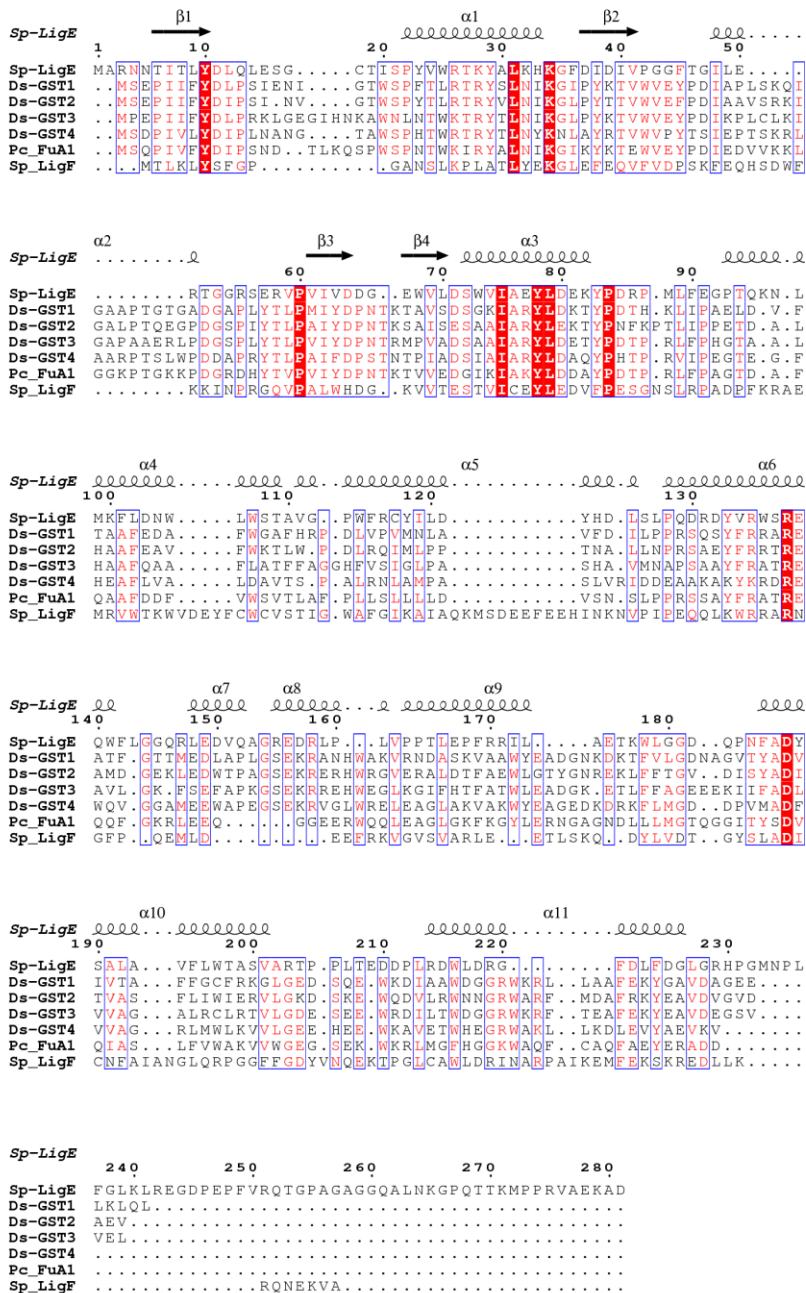

**Figure S1. Alignment of Ds-GST1, Ds-GST2, Ds-GST3 and Ds-GST4 from *D. squalens* with homologs from *Sphingobium* sp. SYK-6 (LigE and LigF), and *P. chrysosporium* (Pc-FuA1).**

Conserved amino acid residues are highlighted in red. LigE secondary structure elements,  $\alpha$ -helices and  $\beta$ -sheets, are shown above the sequence alignment. JGI protein ID numbers are: Ds-GST1, 82843; Ds-GST2, 56311; Ds-GST3, 102613; Ds-GST4, 61773 and Pc-FuA1, 5118. NCBI accession numbers

are: LigE, BAA02032 and LigF, WP\_014075191. The multiple-sequence alignment was generated by ESPript<sup>7</sup>. The amino acid sequence similarity between the four Ds-GSTs ranged from 42% to 55%. Despite the low amino acid sequence similarity, 17-25%, between Ds-GSTs and *Sphingobium* sp. SYK-6 LigE and LigF, the key amino acid residues, e.g. those responsible for non-covalent anchoring of  $\gamma$ -glutamyl (Asp-71 and Ser-72) and glycyl (Tyr-133 and Arg-138) GSH moieties in LigE<sup>8</sup>, are well conserved in Ds-GST1 and Ds-GST3. In Ds-GST2 and Ds-GST4, these residues are replaced by Glu and Lys, respectively. Sequence and crystal structure analyses have revealed a conserved Ser residue near the thiol of the bound GSH in the active site of LigE, LigF and *P. chrysosporium* GSTFuA1 (Ser-21, Ser-14 and Ser-22, respectively) that may have a role in the binding of GSH<sup>8,9</sup>. This residue was also present in Ds-GST1 (Ser-20), Ds-GST2 (Ser-19) and Ds-GST4 (Ser-20). In Ds-GST3, Asn-24 was detected instead of Ser. Surrounding residues, Trp-20 and Pro-22 in LigE, are considered to be a characteristic feature in the GSTFuA class enzymes<sup>10</sup>, and they were conserved in the studied Ds-GSTs, except Ds-GST3 in which Pro was replaced by Leu-25 residue.

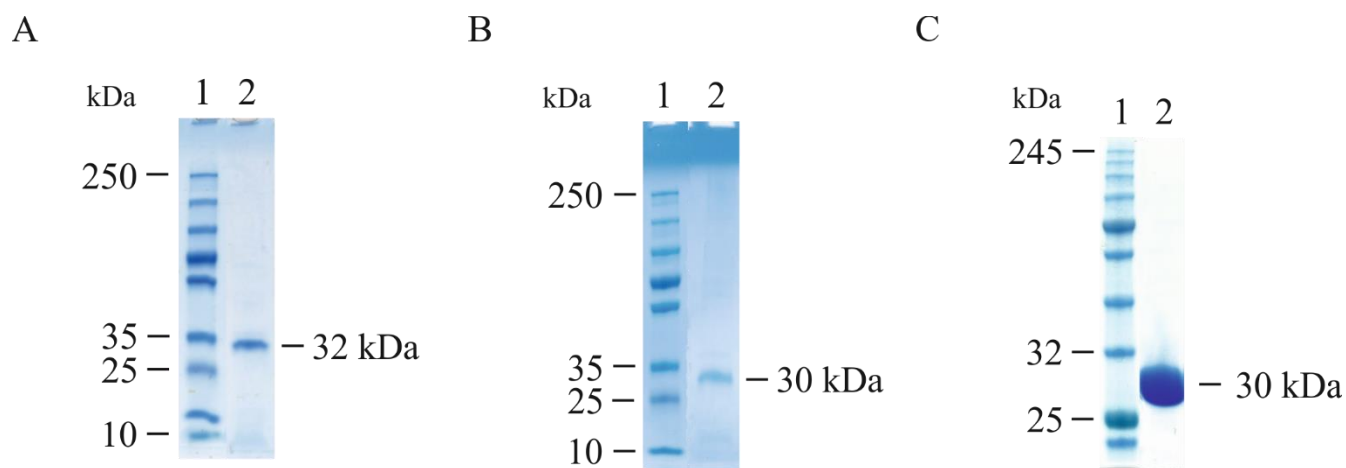

**Figure S2. SDS-PAGE analysis of chromatographically purified recombinant Ds-GSTs.** A) Lane 1: molecular mass standard, lane 2: Ds-GST1. B) Lane 1: molecular mass standard, lane 2: Ds-GST2. C) Lane 1: molecular mass standard, lane 2, Ds-GST3.

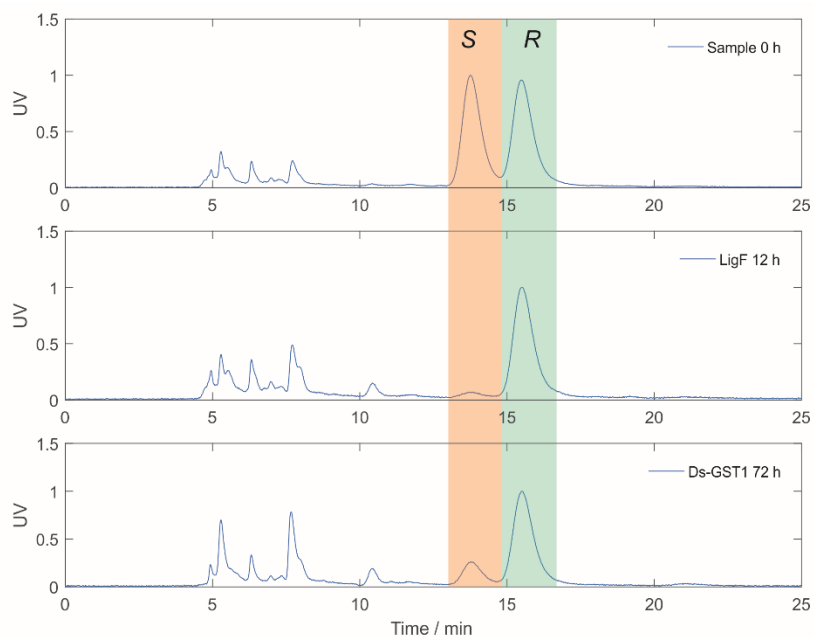

**Figure S3. Chiral chromatography of a racemic lignin model compound (1) at 0 h with LigF and Ds-GST1 catalyzed enzymatic reactions.** A) Racemic lignin model compound (1) exhibiting *S*- and *R*-enantiomers at 0 h. Stereoselective degradation of *S*-enantiomers by B) positive control LigF and C) Ds-GST1.



**Table S1. Putative GST encoding sequences of *D. squalens* with corresponding JGI protein IDs (<http://genome.jgi-psf.org/Dicsq1/Dicsq1.home.html>) identified in this study.**

| #  | Name    | JGI protein ID |
|----|---------|----------------|
| 1  | Ds-GST1 | 82843          |
| 2  | Ds-GST2 | 56311          |
| 3  | Ds-GST3 | 102613         |
| 4  | Ds-GST4 | 61773          |
| 5  |         | 101677         |
| 6  |         | 136582         |
| 7  |         | 69238          |
| 8  |         | 110722         |
| 9  |         | 174906         |
| 10 |         | 76710          |
| 11 |         | 70508          |
| 12 |         | 107335         |
| 13 |         | 135184         |
| 14 |         | 137430         |
| 15 |         | 167503         |
| 16 |         | 169668         |
| 17 |         | 170658         |
| 18 |         | 171068         |
| 19 |         | 174286         |
| 20 |         | 71278          |
| 21 |         | 183150         |
| 22 |         | 65248          |
| 23 |         | 161976         |
| 24 |         | 169691         |
| 25 |         | 172112         |
| 26 |         | 112982         |
| 27 |         | 148760         |
| 28 |         | 111591         |
| 29 |         | 62518          |
| 30 |         | 137388         |
| 31 |         | 181982         |
| 32 |         | 75740          |
| 33 |         | 46340          |
| 34 |         | 51898          |
| 35 |         | 91147          |
| 36 |         | 100284         |

|    |        |
|----|--------|
| 37 | 129051 |
| 38 | 134414 |
| 39 | 173218 |
| 40 | 105731 |
| 41 | 83422  |
| 42 | 49777  |

---

## References

1. Adler, E.; Lindgren, B. O.; Saedén, U., The  $\beta$ -guaiacyl ether of  $\alpha$ -veratrylglycerol as a lignin model. *Svensk Papperstidn.* **1952**, *57*, 245-254.
2. Sipilä, J.; Syrjänen, K., Synthesis and  $^{13}\text{C}$  NMR spectroscopic characterization of six dimeric arylglycerol  $\beta$ -aryl ether model compounds representative of syringyl and *p*-hydroxyphenyl structures in lignins. On the Aldol reaction in  $\beta$ -ether preparation. *Holzforschung* **1995**, *49*, 325-331.
3. Hofrichter, M.; Vares, K.; Scheibner, K.; Galkin, S.; Sipilä, J.; Hatakka, A. Mineralization and solubilization of synthetic lignin by manganese peroxidases from *Nematoloma frowardii* and *Phlebia radiata*. *J. Biotechnol.* **1999**, *67*, 217-228.
4. Quideau, S.; Ralph, J. Facile large-scale synthesis of coniferyl, sinapyl, and *p*-coumaryl alcohol. *J. Agric. Food Chem.* **1992**, *40*, 1108-1110.
5. Nousiainen, P.; Kontro, J.; Manner, H.; Hatakka, A.; Sipilä, J. Phenolic mediators enhance the manganese peroxidase catalyzed oxidation of recalcitrant lignin model compounds and synthetic lignin. *Fungal Genet. Biol.* **2014**, *72*, 137-149.
6. Ürek, R. Ö.; Pazarlioğlu, N. K. Purification and partial characterization of manganese peroxidase from immobilized *Phanerochaete chrysosporium*. *Process Biochem.* **2004**, *39*, 2061-2068.
7. Robert, X.; Gouet, P. Deciphering key features in protein structures with the new ENDscript server. *Nucleic Acids Res.* **2014**, *42*, W320-W324.
8. Helmich, K. E.; Pereira, J. H.; Gall, D. L.; Heins, R. A.; McAndrew, R. P.; Bingman, C.; Deng, K.; Holland, K. C.; Noguera, D. R.; Simmons, B. A.; Sale, K. L.; Ralph, J.; Donohue, T. J.; Adams, P. D.; Phillips, G. N. Structural basis of stereospecificity in the bacterial enzymatic cleavage of  $\beta$ -aryl ether bonds in lignin. *J. Biol. Chem.* **2015**, *291*, 5234-5246.
9. Mathieu, Y.; Prosper, P.; Favier, F.; Harvengt, L.; Didierjean, C.; Jacquot, J. P.; Morel-Rouhier, M.; Gelhaye, E. Diversification of fungal specific class A glutathione transferases in saprotrophic fungi. *PLoS One* **2013**, *8*, e80298.
10. Mathieu, Y.; Prosper, P.; Buee, M.; Dumarcay, S.; Favier, F.; Gelhaye, E.; Gerardin, P.; Harvengt, L.; Jacquot, J. P.; Lamant, T.; Meux, E.; Mathiot, S.; Didierjean, C.; Morel, M. Characterization of a *Phanerochaete chrysosporium* glutathione transferase reveals a novel structural and functional class with ligandin properties. *J. Biol. Chem.* **2012**, *287*, 39001-39011.
